# Supplementary material for: Intracellular thiol-responsive nanosized drug carriers self-assembled by poly(ethylene glycol)-b-poly(ε-caprolactone)-b-poly(ethylene glycol) having multiple bioreducible disulfide linkages in hydrophobic blocks
Source: Royal Society of Chemistry journal article supplement (doi:10.1039/c5ra25319e), 2016-01-01
Supplement: c5ra25319e1.pdf [file c5ra25319e1.pdf]

## Supporting Information

### **Intracellular Thiol-Responsive Nanosized Drug Carriers Self-assembled by Poly(ethylene glycol)-*b*-Poly( $\epsilon$ -caprolactone)-*b*-Poly(ethylene glycol) Having Multiple Bioreducible Disulfide Linkages in Hydrophobic Block**

Seung Yeon Moon<sup>a,†</sup>, Yeon Su Choi<sup>a,†</sup>, Jung-Kyo Cho<sup>a</sup>, Minjong Yu<sup>b</sup>, Eunji Lee<sup>b</sup>, Kang Moo Huh<sup>c</sup>, Don Haeng Lee<sup>d,e</sup>, Jong-Ho Kim<sup>f,\*</sup>, Han Chang Kang<sup>a,\*</sup>

<sup>a</sup> Department of Pharmacy and Integrated Research Institute of Pharmaceutical Sciences, College of Pharmacy, The Catholic University of Korea, 43 Jibong-ro, Wonmi-gu, Bucheon-si, Gyeonggi-do 420-743, Republic of Korea

<sup>b</sup> Graduate School of Analytical Science and Technology, Chungnam National University, 99 Daehak-ro, Yuseong-gu, Daejeon 305-764, Republic of Korea

<sup>c</sup> Department of Polymer Science and Engineering, Chungnam National University, 99 Daehak-ro, Yuseong-gu, Daejeon 305-764, Republic of Korea

<sup>d</sup> Division of Gastroenterology and Hepatology, Department of Internal Medicine, Inha University Hospital, 27 Inhang-ro, Jung-gu, Incheon 400-712, Republic of Korea

<sup>e</sup> Utah-Inha Drug Delivery Systems and Advanced Therapeutics Research Center, 9 Songdomirae-ro, Yeonsu-gu, Incheon 406-840, Republic of Korea

<sup>f</sup> Department of Pharmaceutical Sciences, Kyung Hee University, 26 Kyungheedaero, Dongdaemoon-gu, Seoul 130-701, Republic of Korea

† SYM and YSC equally contributed this work.

\* Co-correspondence to:

Professor Han Chang Kang, Ph.D., Department of Pharmacy and Integrated Research Institute of Pharmaceutical Sciences, College of Pharmacy, The Catholic University of Korea, 43 Jibong-ro, Wonmi-gu, Bucheon-si, Gyeonggi-do 420-743, Republic of Korea

Tel: +82-2-2164-6533; Fax: +82-2-2164-4059

E-mail address: hckang@catholic.ac.kr

Professor Jong-Ho Kim, Ph.D., Department of Pharmaceutical Sciences, Kyung Hee University, 26 Kyungheedaero, Dongdaemoon-gu, Seoul 130-701, Republic of Korea

Tel: +82-2-961-9312-; Fax: +82-2-966-3885

E-mail

address:

jonghokim@khu.ac.kr

(a)

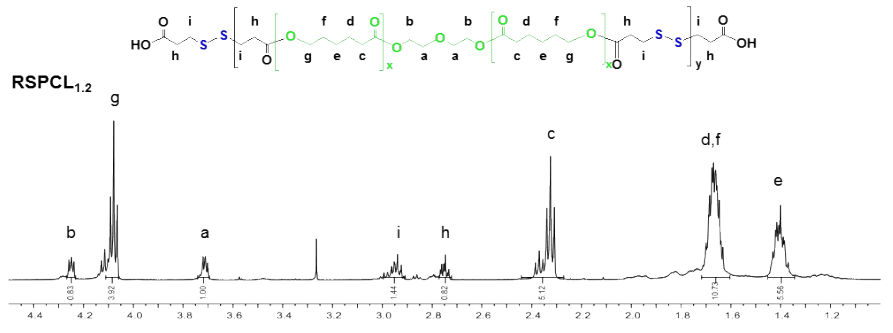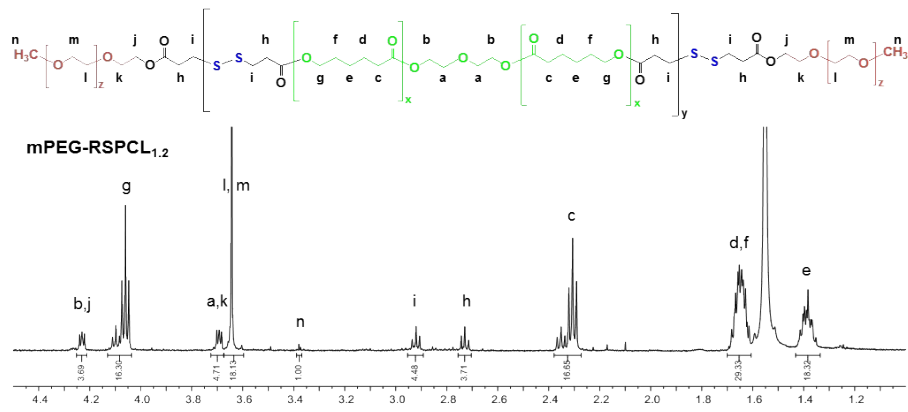

(b)

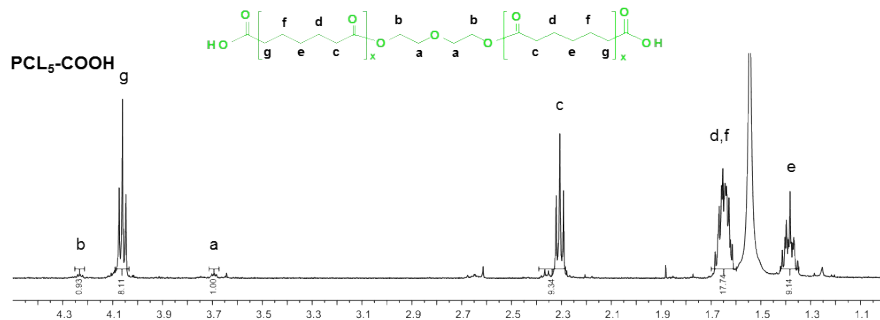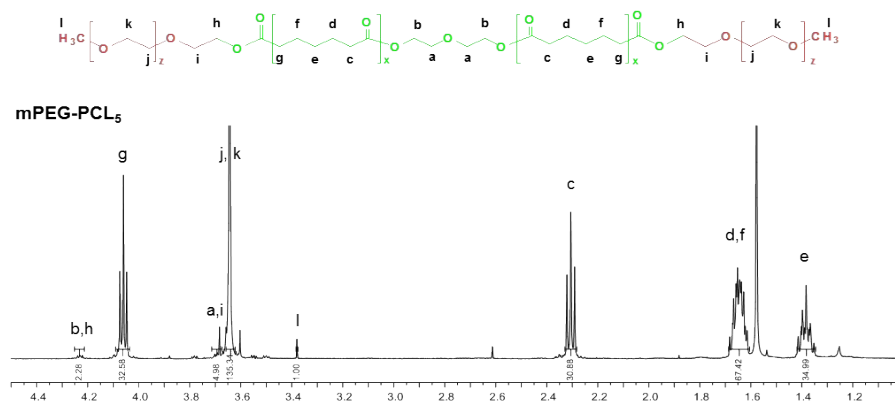

(c)

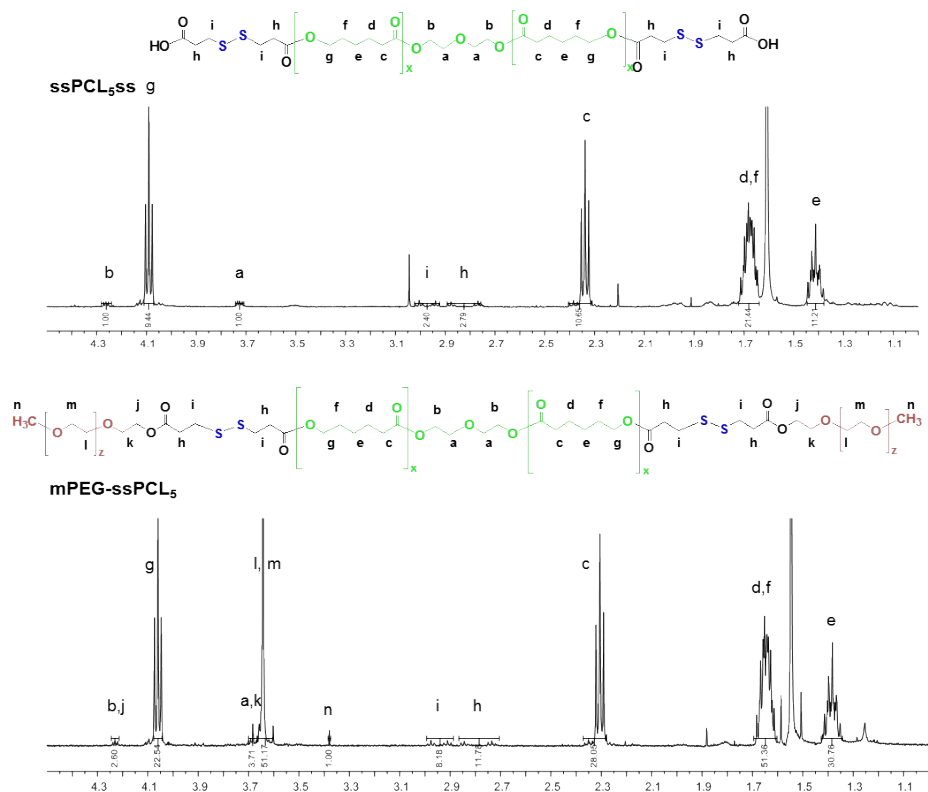

**Figure S1.** <sup>1</sup>H-NMR spectra of (a) the synthesized RSPCL<sub>1,2</sub> polymers and mPEG-RSPCL<sub>1,2</sub> copolymers, (b) the commercially-available PCL<sub>5</sub>-COOH polymers and the synthesized mPEG-PCL<sub>5</sub> copolymers, and (c) the synthesized ssPCL<sub>5</sub> polymers and mPEG-ssPCL<sub>5</sub> copolymers in CDCl<sub>3</sub>.

(a)

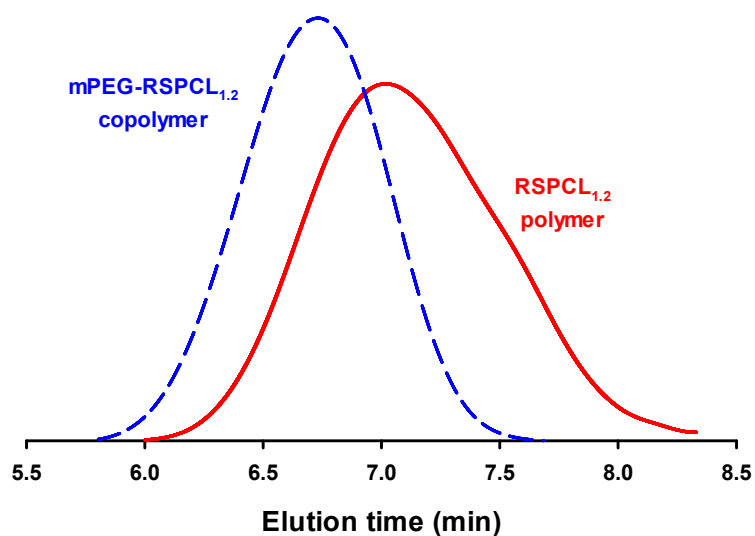

(b)

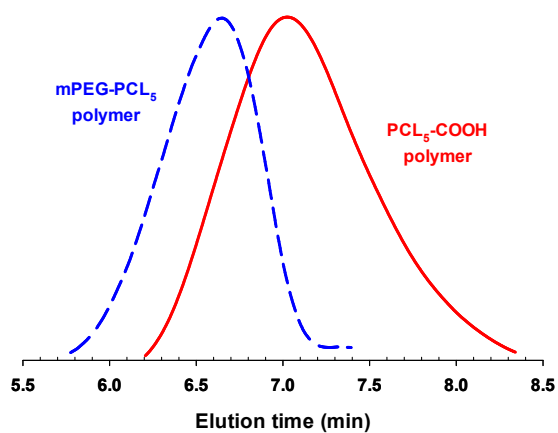

(c)

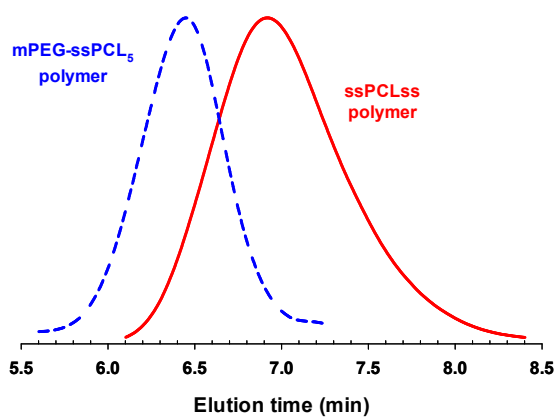

**Figure S2.** GPC chromatograms of (a) the synthesized RSPCL<sub>1,2</sub> polymers and mPEG-RSPCL<sub>1,2</sub> copolymers, (b) the commercially-available PCL<sub>5</sub>-COOH polymers and the synthesized mPEG-PCL<sub>5</sub> copolymers, and (c) the synthesized ssPCL<sub>5</sub>ss polymers and mPEG-ssPCL<sub>5</sub> copolymers in THF.

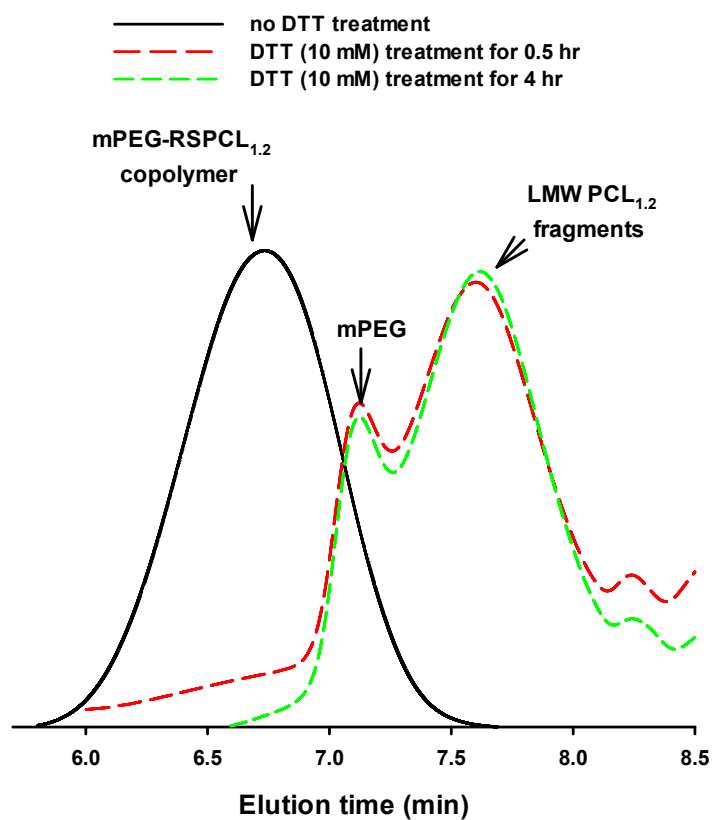

**Figure S3.** Thiol-induced MW change of mPEG-RSPCL<sub>1,2</sub> copolymers in drug-free mPEG-RSPCL<sub>1,2</sub> NPs. The degradation experiment was carried out at 37 °C and was analyzed by GPC chromatograms. ([mPEG-RSPCL<sub>1,2</sub> NP] = 0.25 mg/mL, [DTT] = 10 mM)

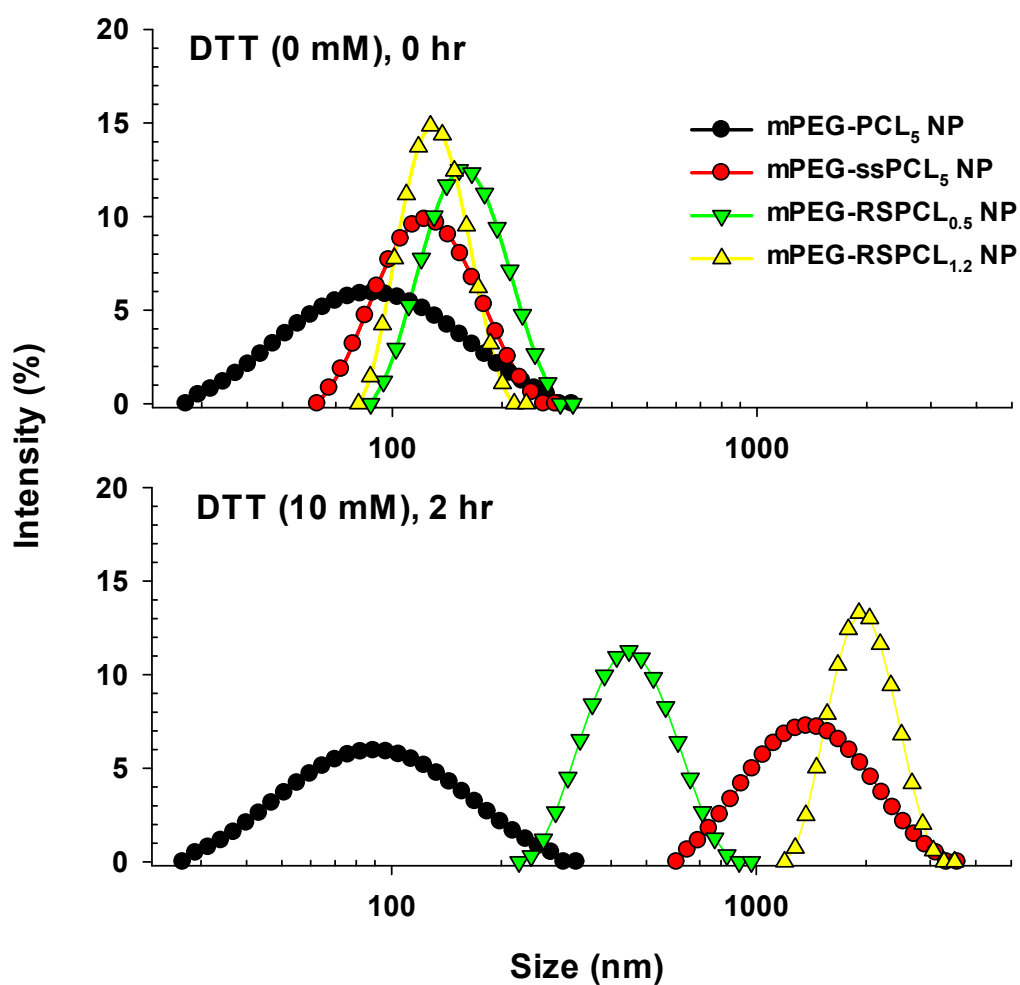

**Figure S4.** Thiol-induced size (intensity average) change of various NPs such as mPEG-PCL<sub>5</sub> NPs, mPEG-ssPCL<sub>5</sub> NPs, mPEG-RSPCL<sub>0.5</sub> NPs and mPEG-RSPCL<sub>1.2</sub> NPs in DTT-containing DPBS (50 mM, pH 7.4). The degradation experiment was performed at 37 °C for 2 hrs. ([Polymer] = 0.25 mg/mL, [DTT] = 10 mM)

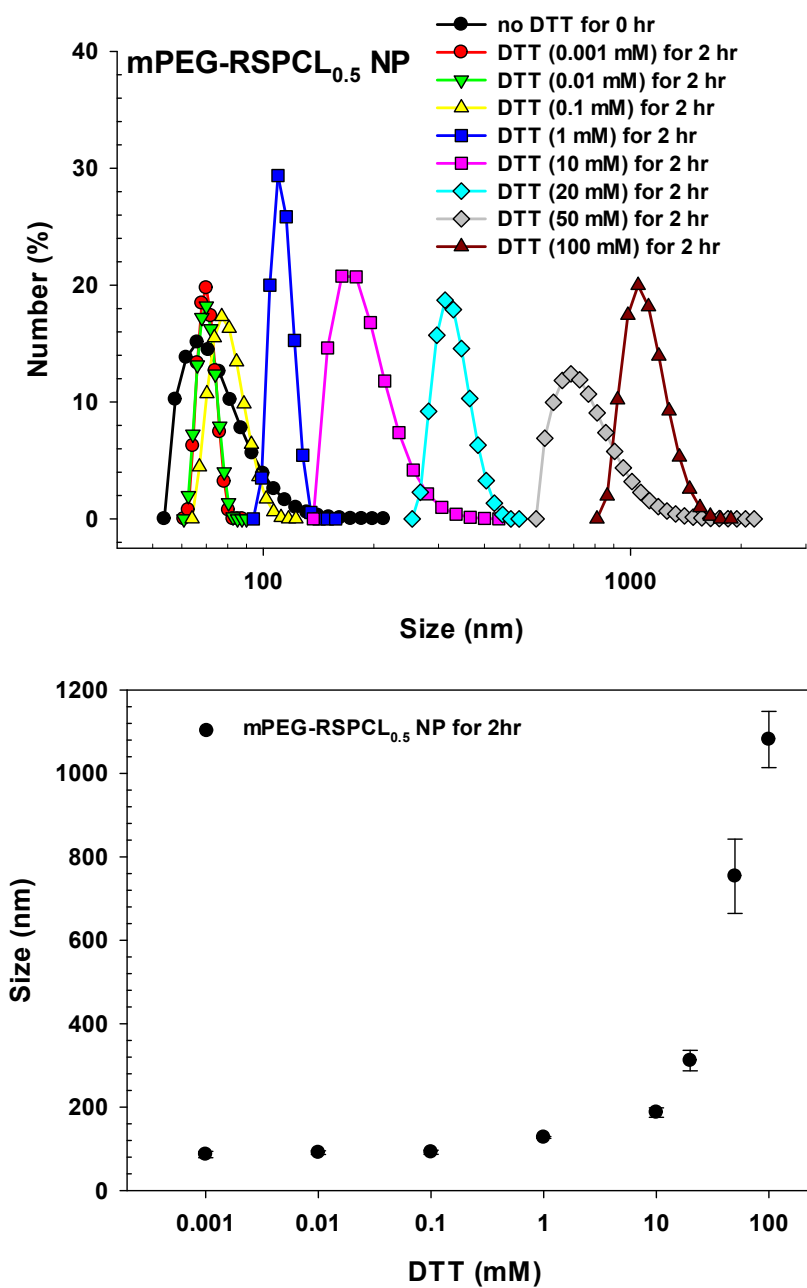

**Figure S5.** Size change of mPEG-RSPCL<sub>0.5</sub> NPs was monitored as a function of DTT concentration (1  $\mu$ M-100 mM) for 2 hr at RT (n=3).

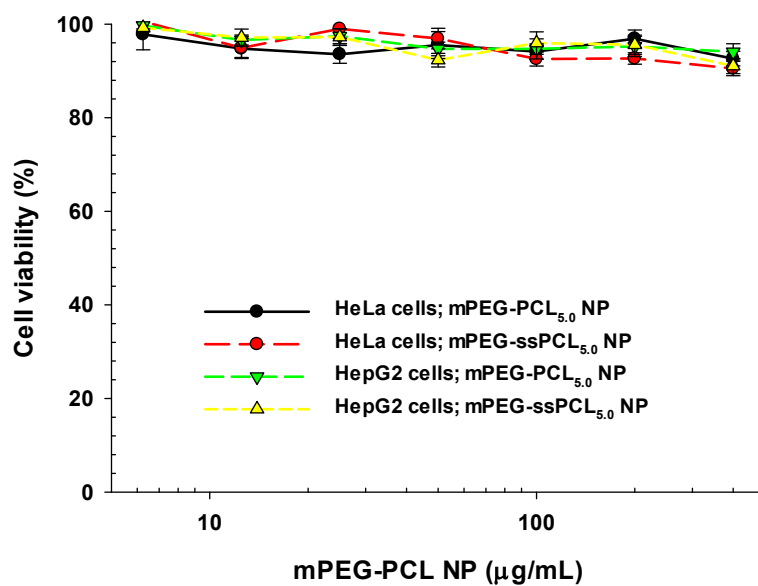

**Figure S6.** In vitro cytotoxicity of drug-free mPEG-PCL<sub>5</sub> NPs and mPEG-ssPCL<sub>5</sub> NPs in HeLa and HepG2 cells 48 hr post-treatment. Various concentrations of NPs were used to treat the cells for 48 hr, and the data are expressed as the mean  $\pm$  standard error of the mean (SEM) (n=12).

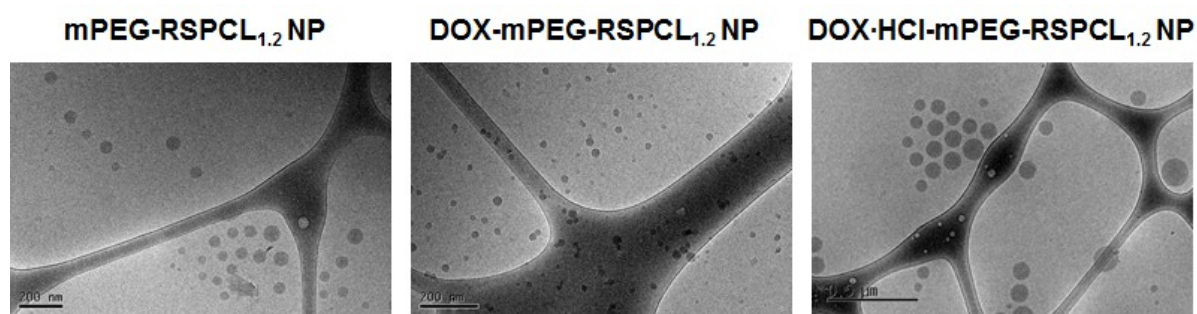

**Figure S7.** CryoTEM images of drug-free mPEG-RSPCL<sub>1.2</sub> NPs and drug-loaded mPEG-RSPCL<sub>1.2</sub> NPs.



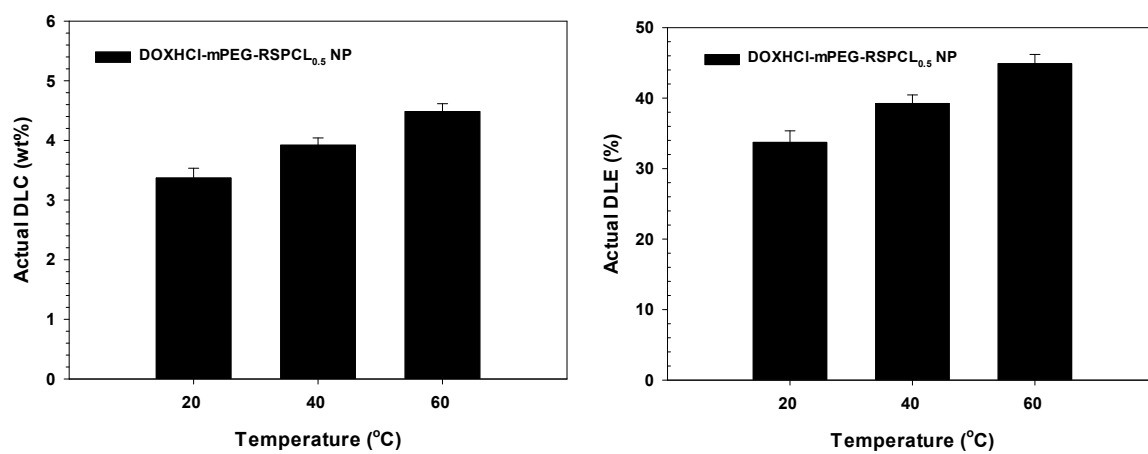

**Figure S8.** Drug loading content (DLC, %) and efficiency (DLE, %) of DOX·HCl-mPEG-RSPCL<sub>0.5</sub> NPs as a function of temperature (n=3).
